# Supplementary material
Source: PubMed Central journal article supplement (PMC3409759)
Supplement: 1203796109_pnas.201203796SI.pdf [file 1203796109_pnas.201203796SI.pdf]

# Supporting Information

Meehan et al. 10.1073/pnas.1203796109

**Table S1. Bacterial strains and plasmids used in this study**

| Strain                      | Relevant characteristics                                                                                                                 | Source            |
|-----------------------------|------------------------------------------------------------------------------------------------------------------------------------------|-------------------|
| <i>Bacteroides fragilis</i> |                                                                                                                                          |                   |
| ADB77                       | TM4000 $\Delta$ thyA, T <sub>p</sub> <sup>R</sup> , 638R derivative                                                                      | 1                 |
| ADB267                      | ADB77 $\Delta$ oxe                                                                                                                       | Present study     |
| ADB266                      | ADB77 $\Delta$ cydAB                                                                                                                     | 2                 |
| IB260                       | 638R $\Delta$ kat::Tet <sup>R</sup>                                                                                                      | 3                 |
| IB263                       | 638RoxyR <sup>C</sup>                                                                                                                    | 4                 |
| MBD616                      | TM4000 thyA <sub>2</sub> $\Delta$ sodA                                                                                                   | Laboratory strain |
| ADB267/616                  | ADB77 $\Delta$ oxe $\Delta$ sod                                                                                                          | Present study     |
| YT135                       | TM4000 batD::Tn4400'                                                                                                                     | 5                 |
| BM28                        | ADB77 $\Delta$ ahpC                                                                                                                      | 6                 |
| BM37                        | ADB77 $\Delta$ kat                                                                                                                       | 6                 |
| BM50                        | BM28 $\Delta$ kat                                                                                                                        | 6                 |
| BM95                        | ADB77 $\Delta$ tpx                                                                                                                       | 6                 |
| BM105                       | BM50 $\Delta$ tpx                                                                                                                        | 6                 |
| BM104                       | ADB267 $\Delta$ ahpC $\Delta$ kat $\Delta$ tpx                                                                                           | Present study     |
| BM131                       | BM28 $\Delta$ tpx                                                                                                                        | Present study     |
| BM2                         | ADB77 $\Delta$ rub                                                                                                                       | Present study     |
| BM118                       | ADB77 $\Delta$ oxyR                                                                                                                      | Present study     |
| BM134                       | $\Delta$ rubrerythrins                                                                                                                   | Present study     |
| <i>Escherichia coli</i>     |                                                                                                                                          |                   |
| DH5 $\alpha$                | $\lambda$ nonlysogen                                                                                                                     | 7                 |
| HB101                       | rpsL20, host strain for pRK231                                                                                                           | 8                 |
| Plasmids                    |                                                                                                                                          |                   |
| RK231                       | RP4 derivative, Tet <sup>R</sup> , tra <sup>+</sup>                                                                                      | 9                 |
| pADB242                     | pYT102 derivative, 0.35 kb BamHI–HindIII fragment replaced by 18 bp BamHI–HindIII fragment from pCR2.1-TOPO (Invitrogen) Cm <sup>R</sup> | 10                |
| pADB267                     | pADB242:: $\Delta$ oxe                                                                                                                   | Present study     |
| pADB293                     | pJST61oxy <sup>+</sup>                                                                                                                   | Present study     |
| pJST61                      | <i>B. fragilis</i> – <i>E. coli</i> shuttle vector, Erm <sup>R</sup> , Amp <sup>R</sup>                                                  | 8                 |

oxyR<sup>C</sup>, constitutively-active oxyR. R, resistant.

- Baughn AD, Malmay MH (2002) A mitochondrial-like aconitase in the bacterium *Bacteroides fragilis*: Implications for the evolution of the mitochondrial Krebs cycle. *Proc Natl Acad Sci USA* 99:4662–4667.
- Baughn AD, Malmay MH (2004) The strict anaerobe *Bacteroides fragilis* grows in and benefits from nanomolar concentrations of oxygen. *Nature* 427:441–444.
- Rocha ER, Selby T, Coleman JP, Smith CJ (1996) Oxidative stress response in an anaerobe, *Bacteroides fragilis*: A role for catalase in protection against hydrogen peroxide. *J Bacteriol* 178:6895–6903.
- Rocha ER, Smith CJ (1998) Characterization of a peroxide-resistant mutant of the anaerobic bacterium *Bacteroides fragilis*. *J Bacteriol* 180:5906–5912.
- Tang YP, Dallas MM, Malmay MH (1999) Characterization of the BatI (*Bacteroides aerotolerance*) operon in *Bacteroides fragilis*: Isolation of a *B. fragilis* mutant with reduced aerotolerance and impaired growth in *in vivo* model systems. *Mol Microbiol* 32:139–149.
- Meehan BM, Malmay MH (2012) Fumarate reductase is a major contributor to the generation of reactive oxygen species in the anaerobe *Bacteroides fragilis*. *Microbiology* 158: 539–546.
- Woodcock DM, et al. (1989) Quantitative evaluation of *Escherichia coli* host strains for tolerance to cytosine methylation in plasmid and phage recombinants. *Nucleic Acids Res* 17: 3469–3478.
- Thompson JS, Malmay MH (1990) Sequencing the gene for an imipenem-cefoxitin-hydrolyzing enzyme (CfiA) from *Bacteroides fragilis* TAL2480 reveals strong similarity between CfiA and *Bacillus cereus* beta-lactamase II. *J Bacteriol* 172:2584–2593.
- Godoy VG, Dallas MM, Russo TA, Malmay MH (1993) A role for *Bacteroides fragilis* neuraminidase in bacterial growth in two model systems. *Infect Immun* 61:4415–4426.
- Baughn AD, Malmay MH (2003) The essential role of fumarate reductase in haem-dependent growth stimulation of *Bacteroides fragilis*. *Microbiology* 149:1551–1558.

**Table S2. Primers used in this study**

| Primer no.                          | Region of homology | Sequence                           |
|-------------------------------------|--------------------|------------------------------------|
| 61RAB                               | pADB242            | GGCGCGCCGTAAGGAAAGTGGCTCTCAG       |
| 646J                                | Tn4400'            | GACTTGGATACCTCACGC                 |
| <i>Bacteroides fragilis</i>         |                    |                                    |
| oxe1                                | Upstream of oxe    | GAAGAAGCTTTGAGTGTGGACGG            |
| oxe2                                | oxe                | GGGCCATGGGCCACATTCCCTCAAAGAGG      |
| oxe3                                | oxe                | AGACCATGGCACGTGTCTATGGCC           |
| oxe4                                | nagB               | TGCGGATCCAGGTGATCTGTCTCG           |
| oxe5                                | upstream of oxe    | GCAATGACTGCGGATCGAGGTG             |
| oxe6                                | upstream of oxe    | CCTGGGATCCGATCTGATACTTGAGCG        |
| oxe7                                | nagB               | CGCCGGATCCGAAACGGACTGATAGTCCG      |
| BAM21                               | rubredoxin         | CGATGGATCCGGACTTGGAAACGATCTGC      |
| BAM22                               | rubredoxin         | TGACCCATGGCTTCCGGATCACCTATCTC      |
| BAM23                               | rubredoxin         | GGCACCATGGGGTATGCCCTCTGTGTGGAG     |
| BAM24                               | rubredoxin         | AGGTGCGGCCGCGGAGGTATGCTTTCTAC      |
| BAM25                               | rubredoxin         | GACGATGGCATTCACTGG                 |
| BAM251                              | oxyR               | ACATGGATCCGGAGATTATTGAATTTACCAAACG |
| BAM252                              | oxyR               | ACATCCATGGCGGAACTGGTCCACAG         |
| BAM253                              | oxyR               | ACATCCATGGGAAAGAGGAGATTCAGGCGG     |
| BAM254                              | oxyR               | ATATGCGGCCGCACAATGAAGATTCCC        |
| BAM255                              | oxyR               | CGGCAAGCAGTTGCTGTAATGACAGTACG      |
| BAM263                              | rubrerythrinA      | GCAGATGTTGCAGAACAGGA               |
| BAM264                              | rubrerythrinA      | AGACATGCCGGACATACCTC               |
| BAM265                              | rubrerythrinA      | TCATGGGCGAATGTACTGAA               |
| BAM266                              | rubrerythrinA      | CATACGCAATCACCCAACAG               |
| BAM267                              | rubrerythrinA      | ACATGGATCCCGAATATGTGCAATCTGGG      |
| BAM268                              | rubrerythrinB      | ACATTCTAGAAGCAAATGATGTGCAAAATTC    |
| BAM269                              | rubrerythrinB      | ATTATCTAGATGTCTGCATCCACAAGCATA     |
| BAM270                              | rubrerythrinB      | ACATGCGGCCGCGGAAGAGACTAAAAAAC      |
| BAM271                              | rubrerythrinB      | CACCAGTTGACTGTGTGCAATGCCG          |
| BAM272                              | rubrerythrinB      | ACATGGATCCGTATTAAGGCACTCAGACAG     |
| BAM273                              | rubrerythrinB      | ATTAGCGGCCGCCCTTTTCTGCAATAGAG      |
| <i>Bacteroides thetaiotaomicron</i> |                    |                                    |
| BAM110                              | Upstream of oxe    | AAGAATGAAAGAAAGGGGAGC              |
| BAM111                              | oxe                | GAATCCTTCAATCATGCCGAA              |
| BAM112                              | oxe                | GGAGGACTGCCTATCACTACC              |
| BAM113                              | nagB               | AATGTGCAGCCCACTGAGATA              |
